# Supplementary material
Source: PubMed Central journal article supplement (PMC534503)

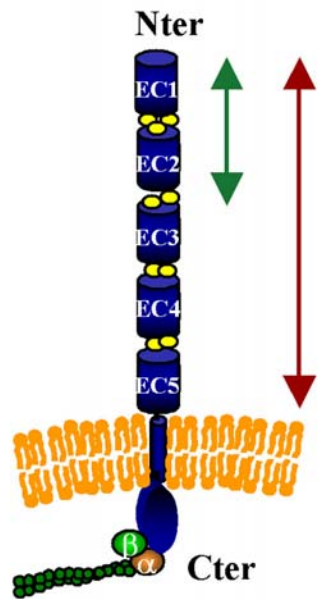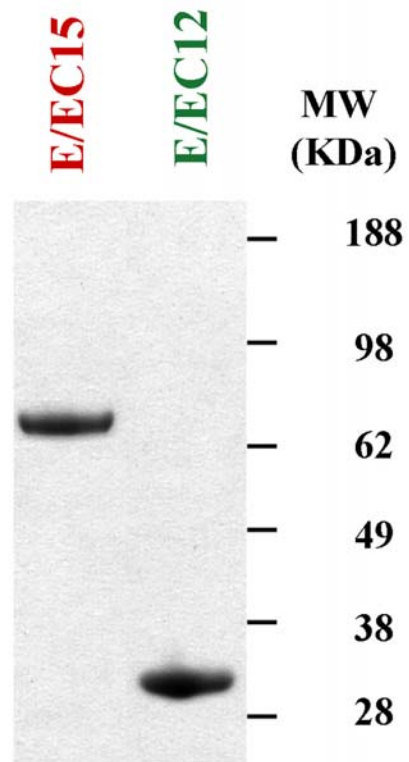

Supplement: pnas_101_47_16472__2.pdf [file pnas_101_47_16472__2.pdf]

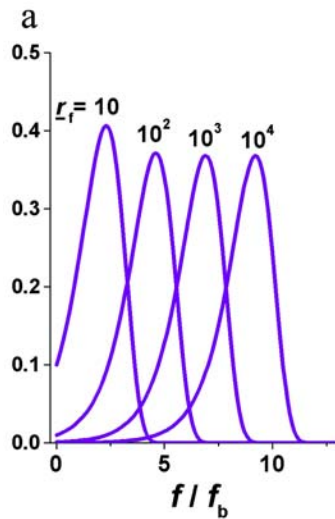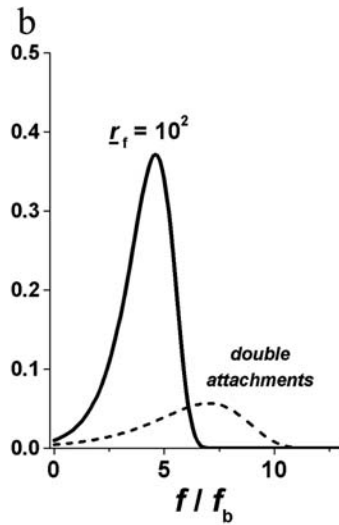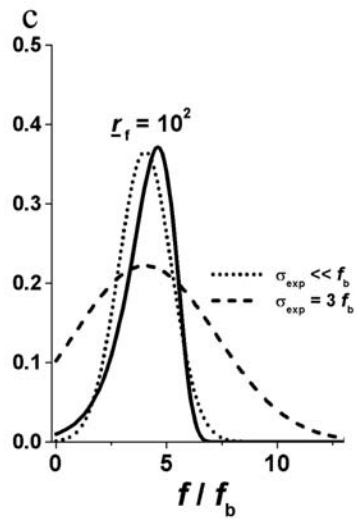

Supplement: pnas_101_47_16472__3.pdf [file pnas_101_47_16472__3.pdf]

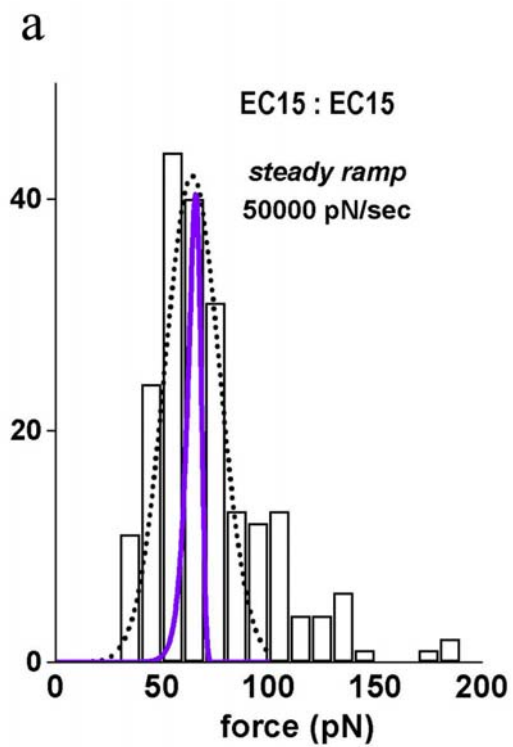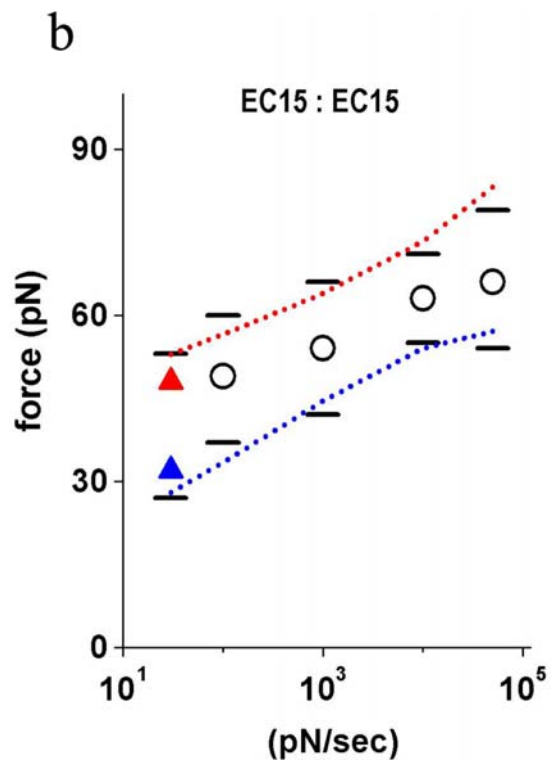

Supplement: pnas_101_47_16472__4.pdf [file pnas_101_47_16472__4.pdf]

a

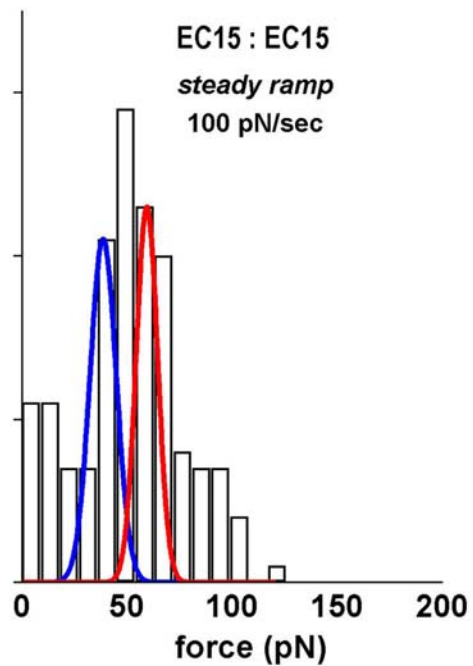

b

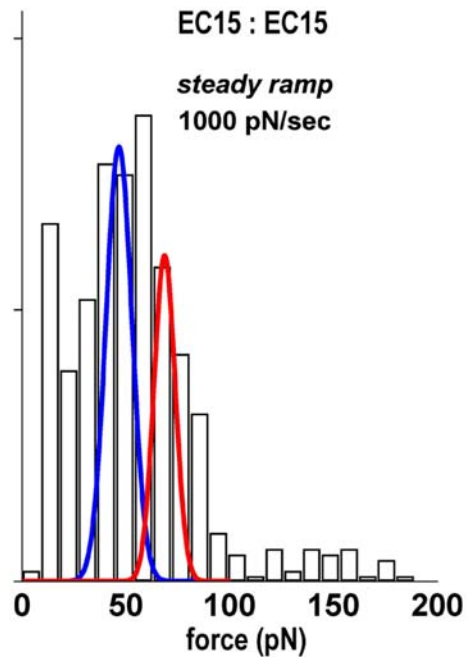

Supplement: pnas_101_47_16472__5.pdf [file pnas_101_47_16472__5.pdf]

**a**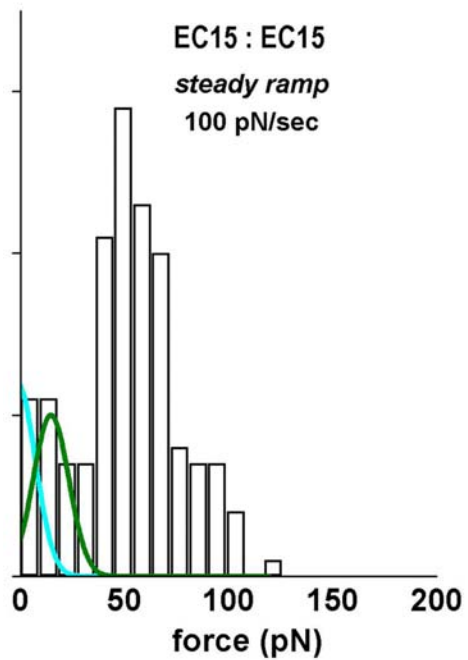**b**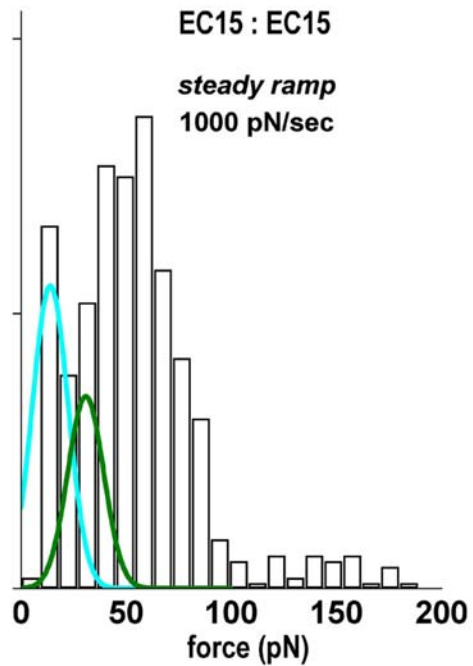

Supplement: pnas_101_47_16472__6.pdf [file pnas_101_47_16472__6.pdf]

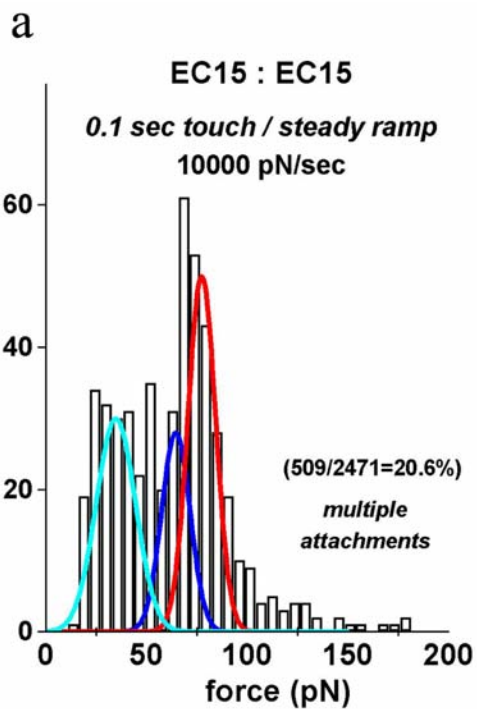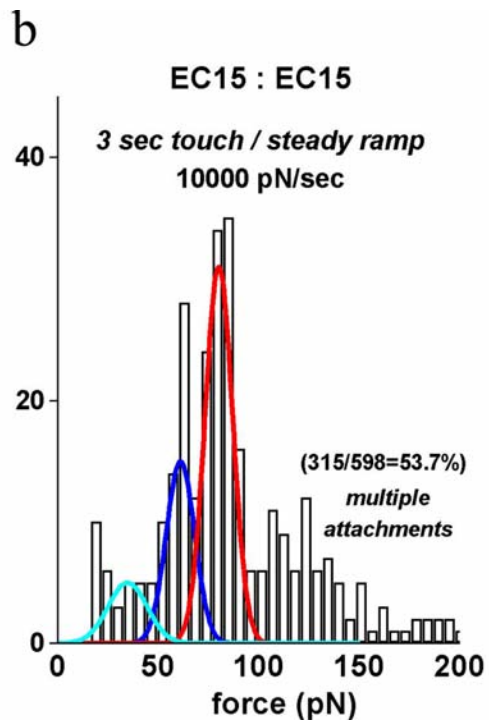

Supplement: pnas_101_47_16472__7.pdf [file pnas_101_47_16472__7.pdf]

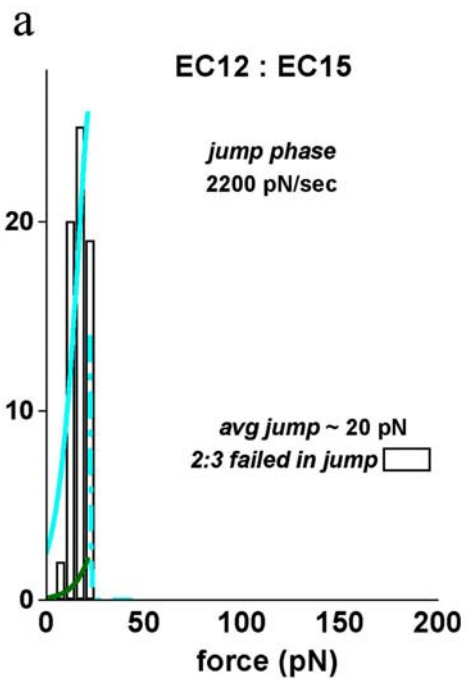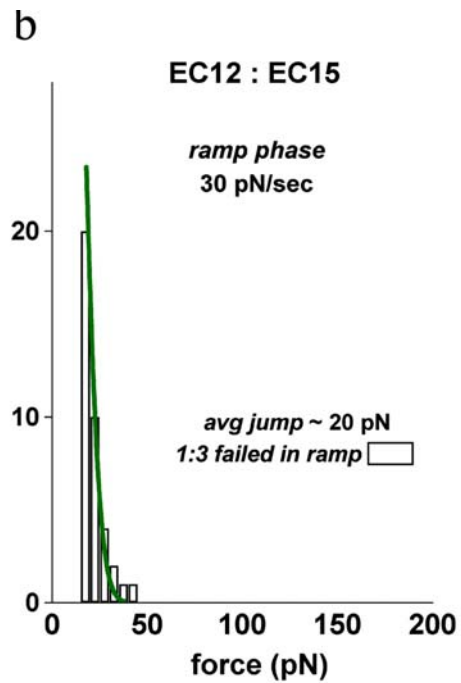

Supplement: pnas_101_47_16472__8.pdf [file pnas_101_47_16472__8.pdf]
